# Supplementary material for: Consider Hereditary Angioedema in the Differential Diagnosis for Unexplained Recurring Abdominal Pain
Source: PubMed Central journal article supplement (PMC9432812; doi:10.1097/mcg.0000000000001744), 2022-08-15
Supplement: mcg-56-740-s002.pdf [file mcg-56-740-s002.pdf]

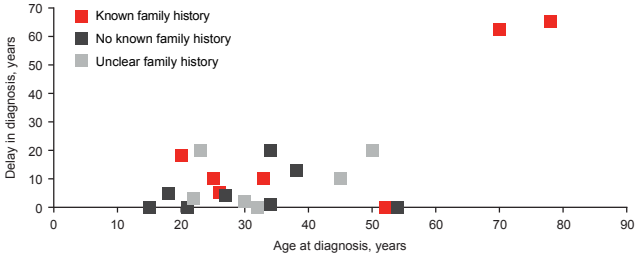

**FIGURE, SUPPLEMENTAL DIGITAL CONTENT 2.** Case studies of patients with gastrointestinal symptoms prior to diagnosis of hereditary angioedema show there is no relationship between family history and age at diagnosis.<sup>34-55</sup>
